# Supplementary material for: Potential Association of the Oral Microbiome with Trimethylamine N-Oxide Quantification in Mexican Patients with Myocardial Infarction
Source: Hindawi journal article supplement (doi:10.1155/2024/3985731), 2024-02-20
Supplement: f1 [file 3985731.f1.pdf]

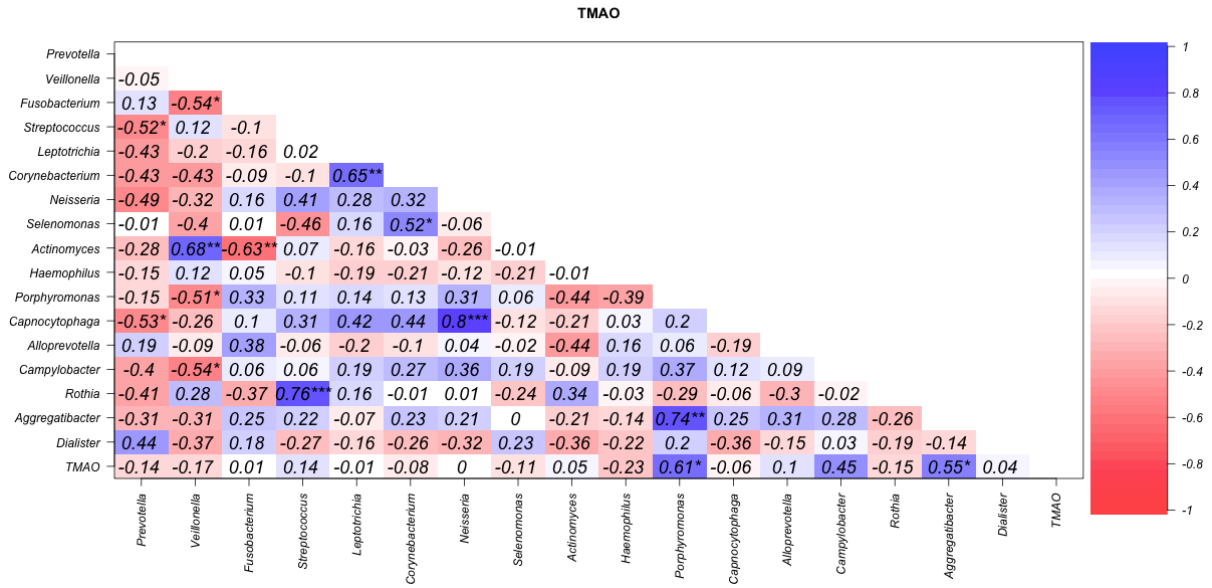

1  
2  
3  
4  
5

**Supplementary figure 1.** Correlation matrix of oral microbiota diversity and trimethylamine N-oxide (TMAO) quantification in myocardial infarction patients. p value (\*<0.05, \*\* <0.01, \*\*\*<0.001).

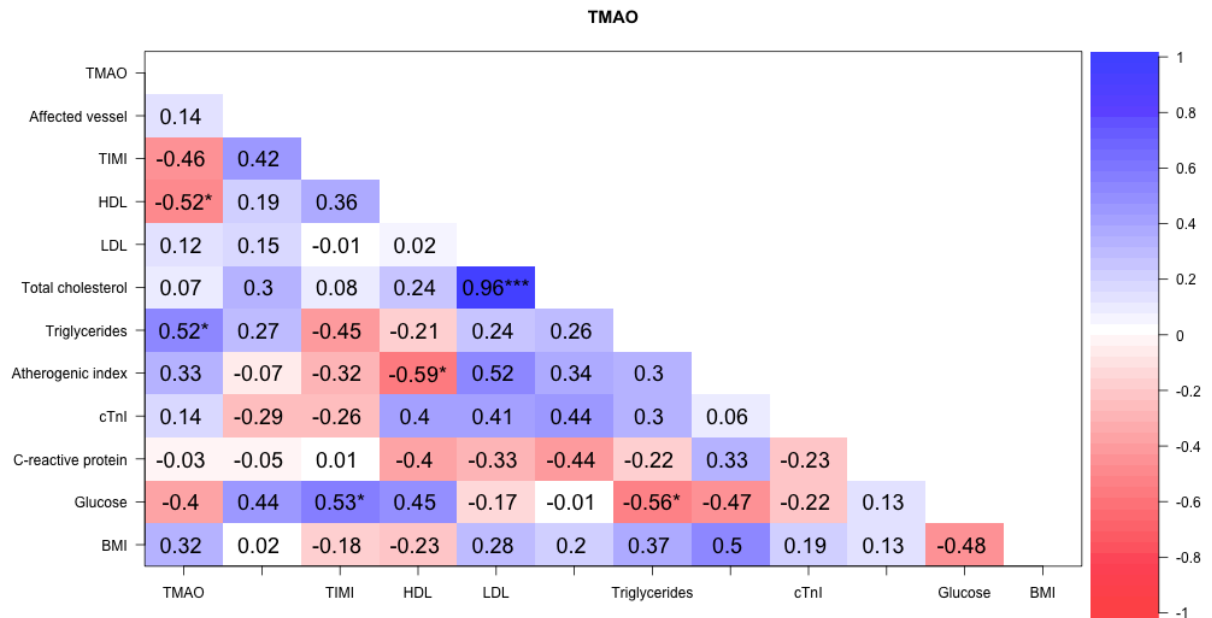

6  
7  
8  
9  
10

**Supplementary figure 2.** Correlation matrix of trimethylamine N-oxide (TMAO) quantification with biochemical and clinical parameters in myocardial infarction patients. p value (\*<0.05, \*\* <0.01, \*\*\*<0.001). TIMI: Thrombolysis in Myocardial Infarction score, HDL: high density protein, LDL: low density protein, cTnI: Cardiac troponin I, BMI: body mass index.
